# Supplementary material for: Effect of metal complexation on the radiolytic stability of DOTA
Source: Royal Society of Chemistry journal article supplement (doi:10.1039/d3dt00977g), 2023-01-01
Supplement: d3dt00977g1.pdf [file d3dt00977g1.pdf]

## Effect of metal complexation on the radiolytic stability of DOTA

Ilyes Mahti, Dominique Guillaumont\*, Claude Berthon, Georges Saint-Louis, Xavier Hérès,  
Laurence Berthon\*

CEA, DES, ISEC, DMRC, Univ Montpellier, Marcoule, France

\*Corresponding author: [Laurence.berthon@cea.fr](mailto:Laurence.berthon@cea.fr), [Dominique.guillaumont@cea.fr](mailto:Dominique.guillaumont@cea.fr)

### Supplementary information

#### Characterization of Zr-DOTA.

Formation of the Zr-DOTA complex was confirmed by ESI-MS (Figure S1) and NMR spectroscopy (Figure S2 and Figure S3). ESI-MS spectrum show peaks at  $m/z = 491.1$  corresponding to  $ZrC_{16}H_{25}O_8N_4$  ( $[ML]H^+$ ). Proton attribution was made by using 2D analysis (gHSQC  $^{13}C$  and NOESY). Results are in good agreement with Parker et al. study.<sup>1</sup> No free ligand was observed in both techniques.

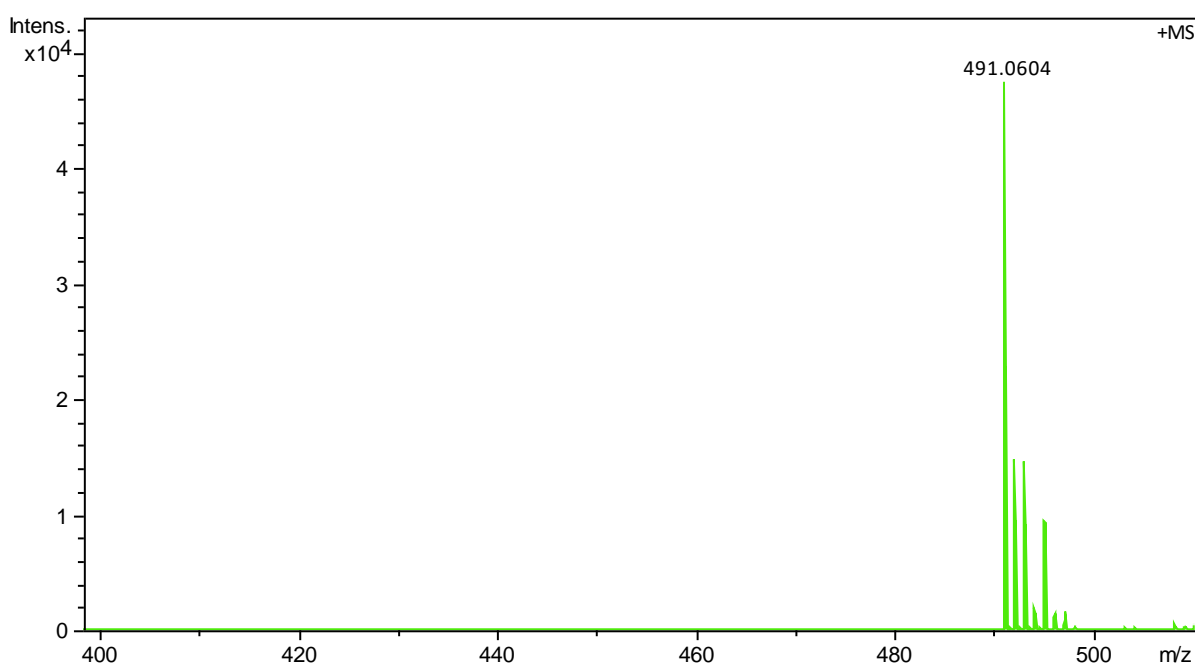

Figure S1: ESI-MS spectrum of Zr-DOTA complex in water ( $[Zr-DOTA] = 5mM$ ). Diluted 50 times in water.

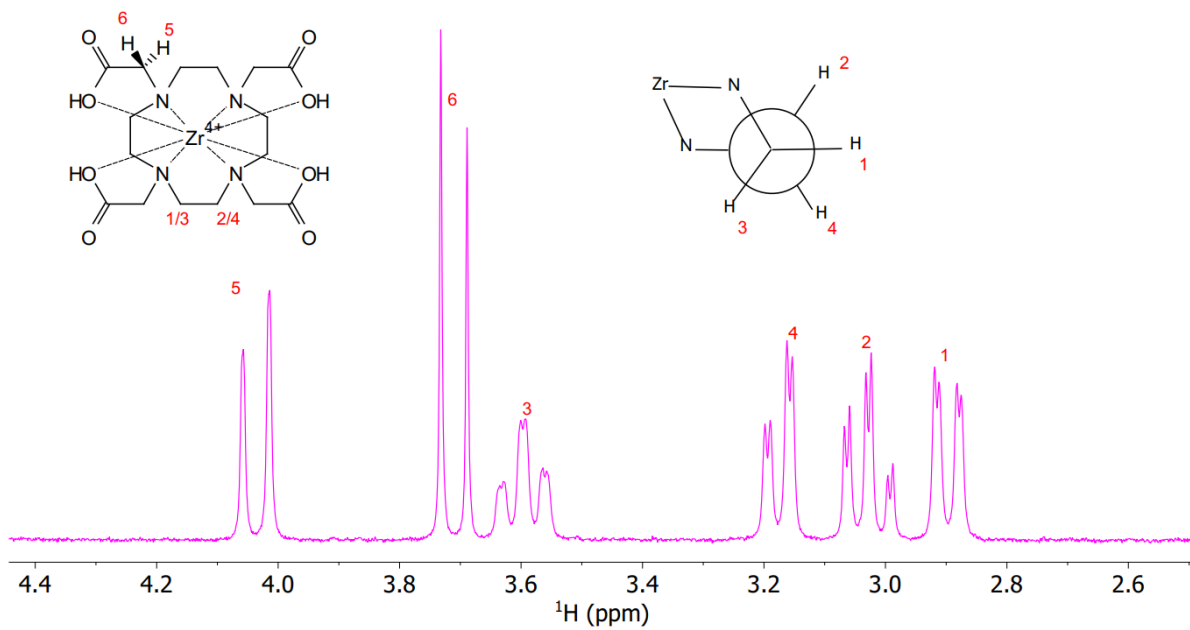

Figure S2:  $^1\text{H}$  NMR spectrum of Zr-DOTA complex in  $\text{H}_2\text{O}$  ( $[\text{Zr-DOTA}] = 5 \text{ mM}$ ).  $\text{CDCl}_3$  with 0.03%*vol* TMS was used as external lock solvent (in a capillary tube).

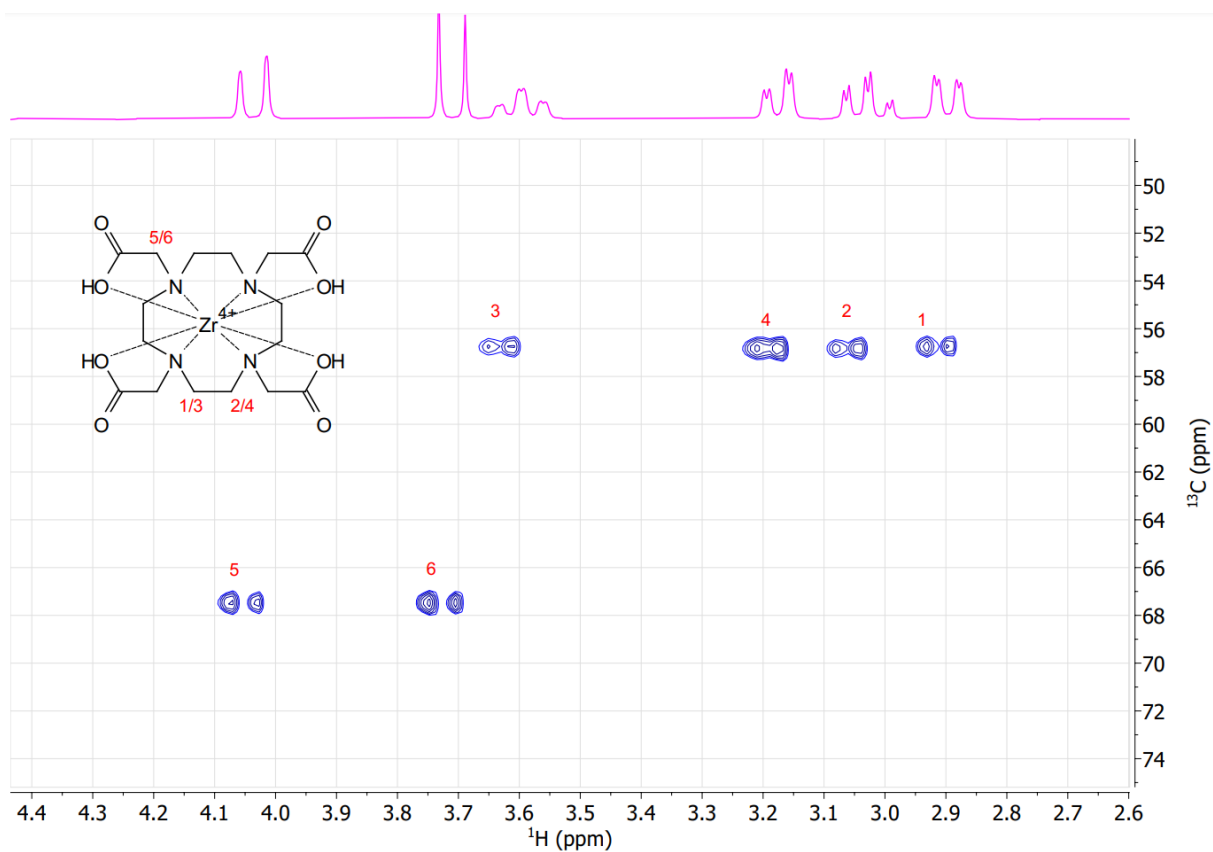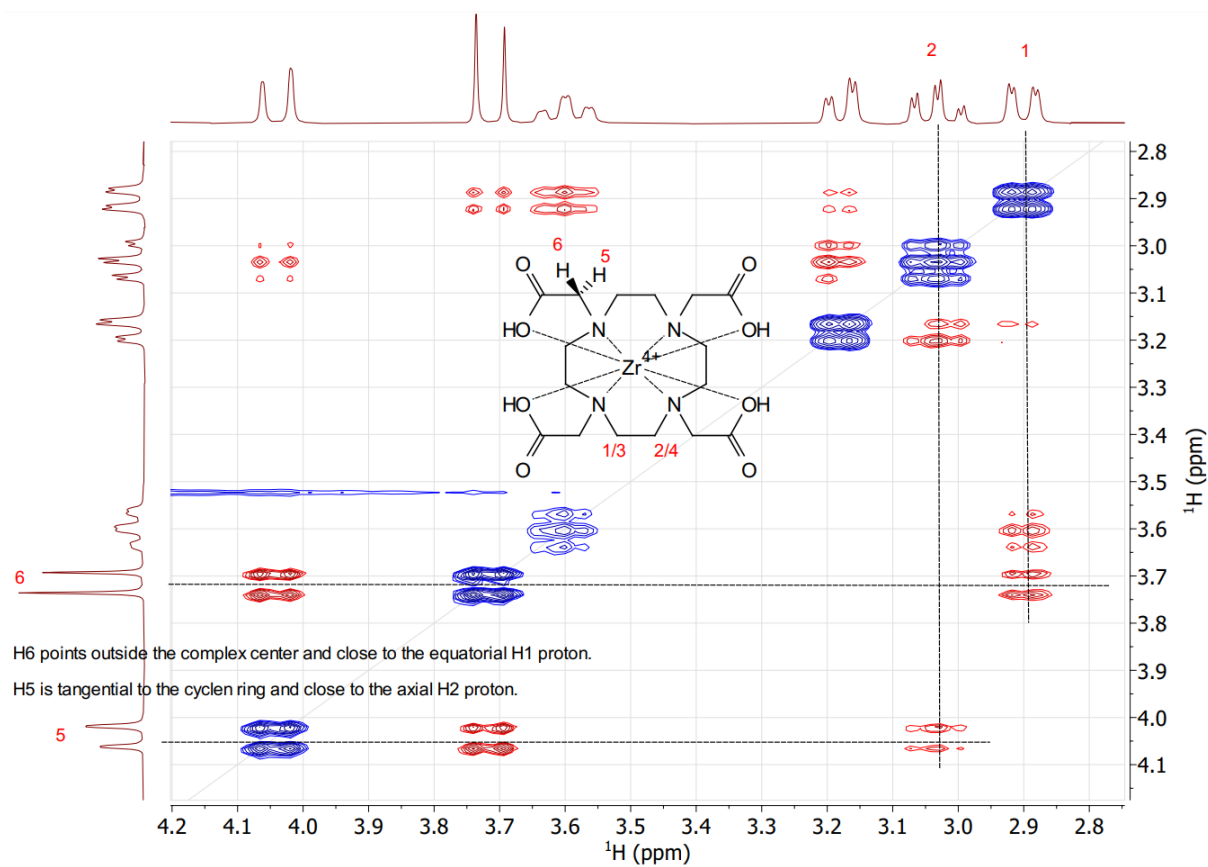

Figure S3: gHSQC  $^{13}\text{C}$  (top) and NOESY (bottom) NMR spectra of Zr-DOTA complex in  $\text{H}_2\text{O}$  ( $[\text{Zr-DOTA}] = 5\text{mM}$ ).  $\text{CDCl}_3$  with 0.03% vol TMS was used as external lock solvent (in a capillary tube).

## NMR signals integration and determination of the dose constant.

Proton NMR signals of DOTA and Zr-DOTA between 0 and 30 kGy were integrated. Values obtained are presented in Table S1 and Table S2. This allow the calculation of  $C/C_0$  ( $C_0$  and  $C$  are the initial and final concentration) and thus to plot  $\ln(C/C_0)$  as a function of the absorbed dose (Figure S4). As it is linear, it shows that we have an exponential decrease with a pseudo-first-order kinetics. The slope of the curve corresponds to the dose constant ( $d$ ).

Table S1: Proton NMR signals integration for DOTA. NMR signals for acetate and cyclen protons correspond to those shown in Figure 2 (main text) at respectively 2.74 and 2.26 ppm.

| kGy | Acetate | Cyclen | Mean % |
|-----|---------|--------|--------|
| 0   | 100%    | 100%   | 100%   |
| 10  | 23%     | 20%    | 22%    |
| 20  | 10%     | 9%     | 10%    |
| 30  | 7%      | 4%     | 6%     |

Table S2: Proton NMR signals integration for Zr-DOTA. NMR signals number correspond to those shown in Figure S2.

| kGy | 6    | 5    | 3    | 4    | 2    | 1    | Mean % |
|-----|------|------|------|------|------|------|--------|
| 0   | 100% | 100% | 100% | 100% | 100% | 100% | 100%   |
| 10  | 77%  | 77%  | 83%  | 80%  | 82%  | 80%  | 80%    |
| 20  | 62%  | 62%  | 72%  | 65%  | 66%  | 63%  | 65%    |
| 30  | 56%  | 56%  | 68%  | 58%  | 59%  | 53%  | 58%    |

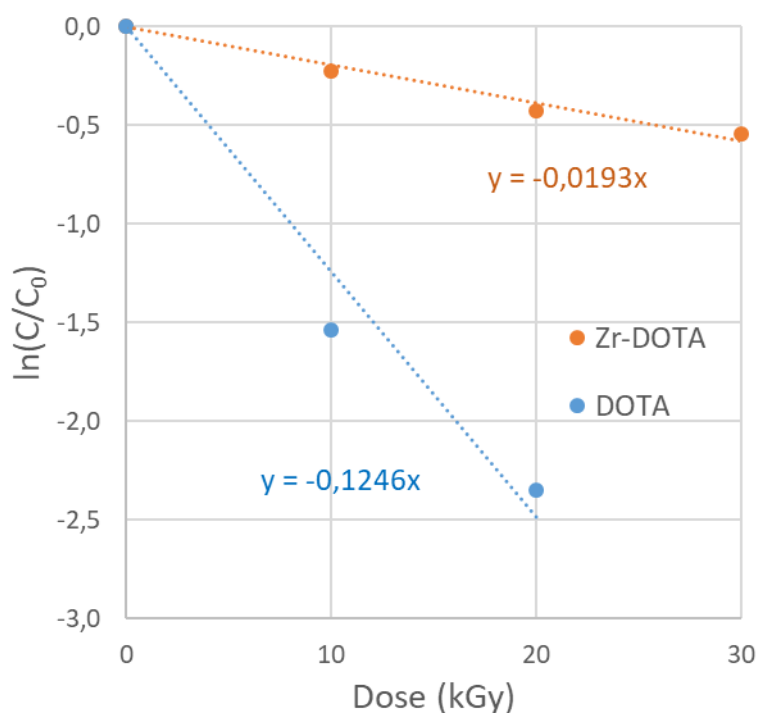

Figure S4: Determination of the dose constant for DOTA (blue) and Zr-DOTA (orange) by plotting  $\ln(C/C_0)$  as a function of dose.

## Tandem mass spectrometry (MS/MS) of DOTA and major degradation products.

MS/MS analysis were performed for DOTA and degradation products observed (Figure S5 to S7). Because of their low concentration, only the major ones were analysed. Results concerning the free ligand show good agreement with the study of Fiegel et al.<sup>2</sup>

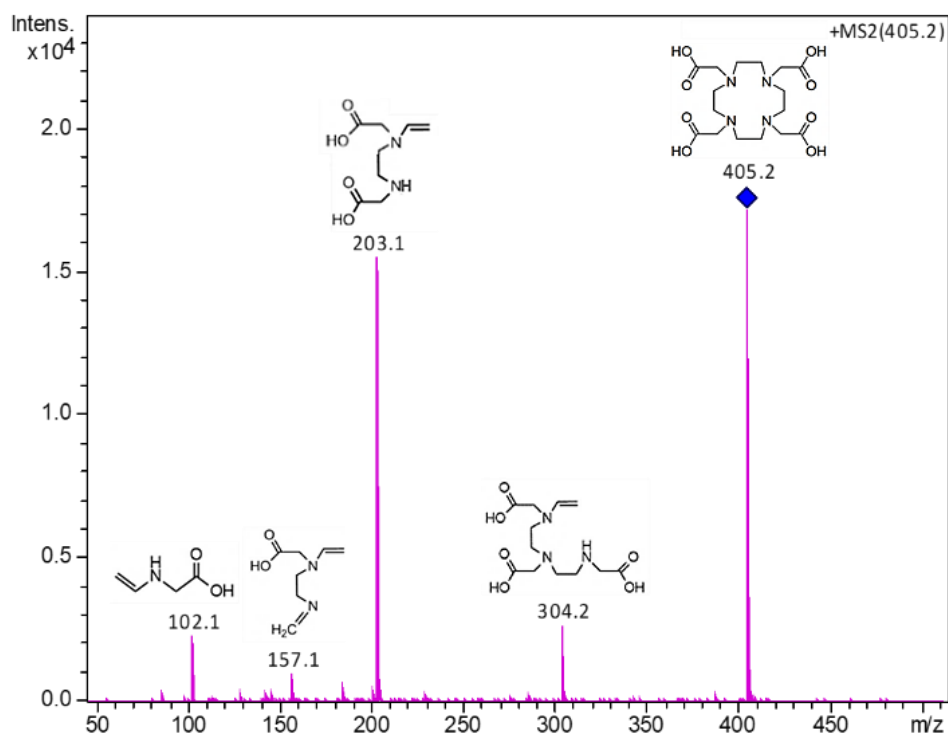

Figure S5: MS/MS of DOTA ( $m/z = 405.2$ ). Collision: 25 eV.

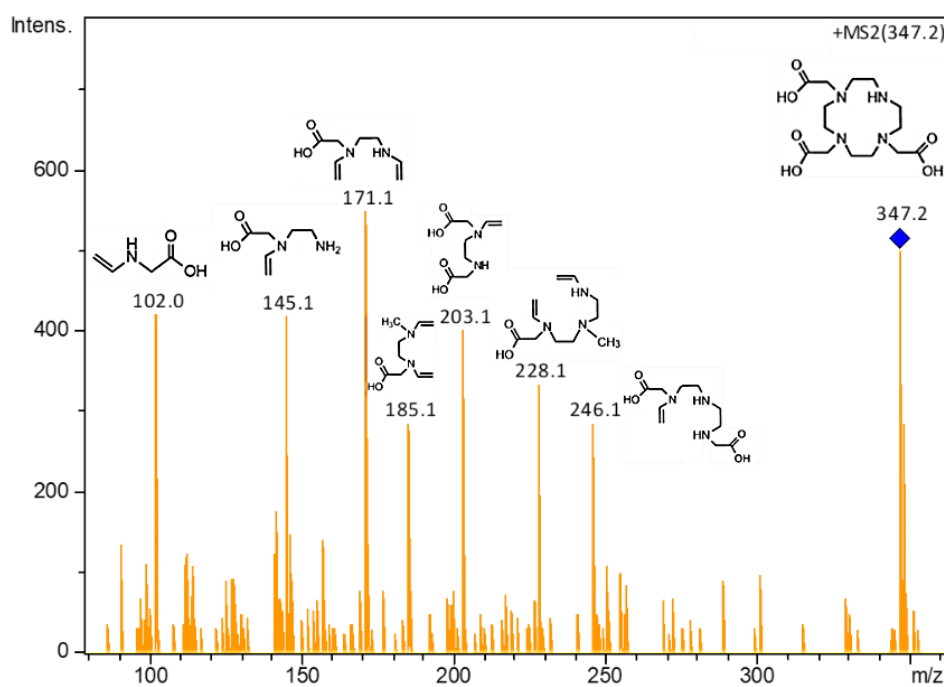

Figure S6: MS/MS of the major degradation product observed for DOTA ( $m/z = 347.2$ ). Collision: 30 eV.

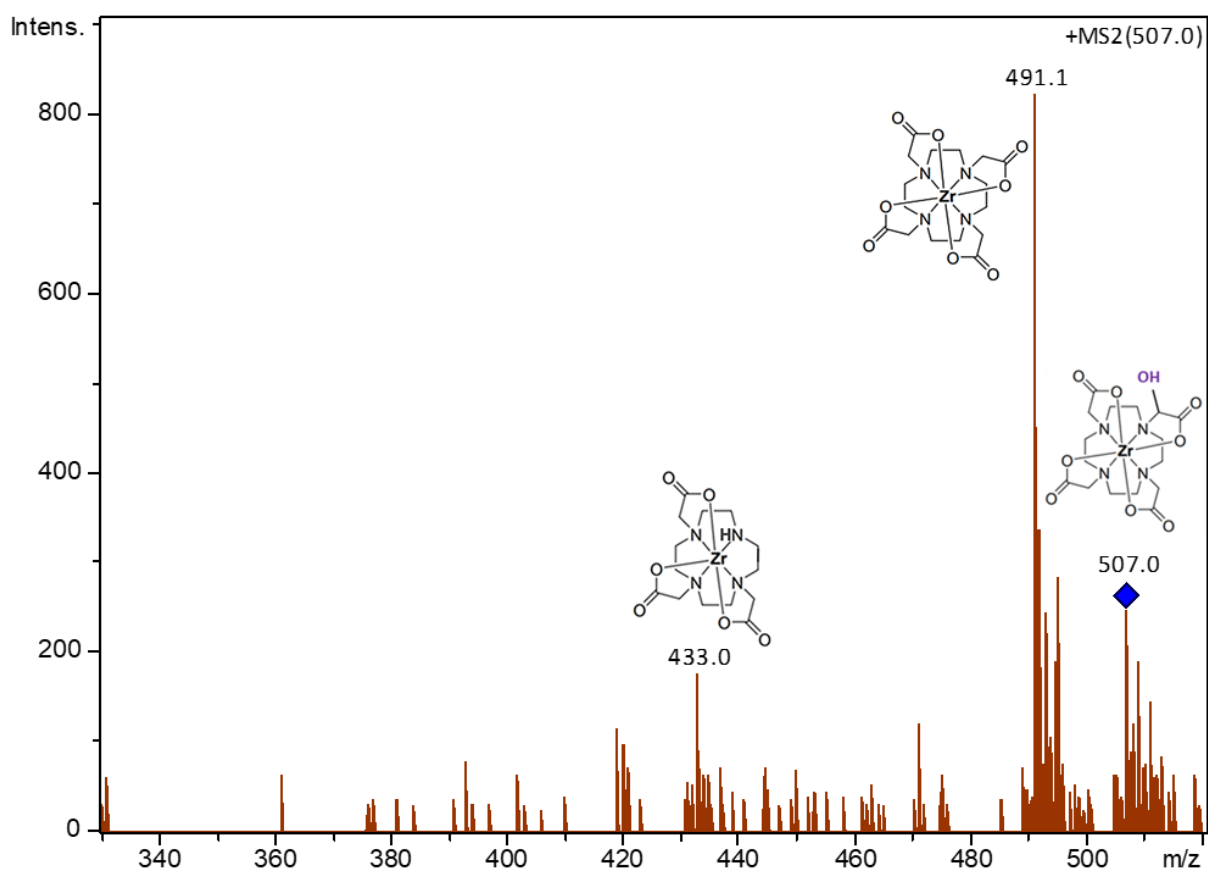

Figure S7: MS/MS of the major degradation product observed for Zr-DOTA ( $m/z = 507$ ). Collision: 20 eV.

### Fukui indices and CDD values for all atoms of H<sub>4</sub>DOTA and Zr-DOTA.

Table S3 and Table S4 list Fukui indices and CDD values of H<sub>4</sub>DOTA and Zr-DOTA respectively. Figure S8 and Figure S9 present the structures of H<sub>4</sub>DOTA and Zr-DOTA with atomic numbering.

Table S3: Fukui indices ( $f^0$ ) and CDD values for all atoms of  $H_4DOTA$ .

| Number | Atom | $f^0$  | CDD     |
|--------|------|--------|---------|
| 1      | C    | -0.003 | 0.0001  |
| 2      | H    | 0.009  | -0.0059 |
| 3      | H    | 0.002  | -0.0015 |
| 4      | C    | -0.007 | 0.0108  |
| 5      | H    | 0.016  | -0.0151 |
| 6      | H    | 0.007  | -0.0042 |
| 7      | C    | -0.004 | 0.0151  |
| 8      | H    | 0.015  | -0.0083 |
| 9      | H    | 0.004  | -0.0081 |
| 10     | C    | -0.002 | -0.0001 |
| 11     | H    | 0.008  | -0.0050 |
| 12     | H    | 0.005  | -0.0035 |
| 13     | C    | 0.002  | 0.0046  |
| 14     | H    | 0.01   | -0.0068 |
| 15     | H    | 0.007  | -0.0085 |
| 16     | C    | 0.003  | -0.0061 |
| 17     | C    | 0.012  | 0.0413  |
| 18     | H    | 0.045  | 0.0437  |
| 19     | H    | 0.009  | 0.0145  |
| 20     | C    | 0.079  | 0.1578  |
| 21     | N    | 0.003  | -0.0008 |
| 22     | H    | -0.002 | -0.0035 |
| 23     | N    | 0.049  | -0.0846 |
| 24     | O    | 0.103  | -0.1946 |
| 25     | O    | 0.039  | -0.0853 |
| 26     | O    | 0.026  | 0.0354  |
| 27     | H    | 0.017  | 0.0288  |
| 28     | O    | 0.047  | 0.0887  |
| 29     | C    | -0.003 | 0.0001  |
| 30     | H    | 0.009  | -0.0059 |
| 31     | H    | 0.002  | -0.0015 |
| 32     | C    | -0.007 | 0.0108  |
| 33     | H    | 0.016  | -0.0151 |
| 34     | H    | 0.007  | -0.0042 |
| 35     | C    | -0.004 | 0.0152  |
| 36     | H    | 0.015  | -0.0083 |
| 37     | H    | 0.004  | -0.0081 |
| 38     | C    | -0.002 | -0.0001 |
| 39     | H    | 0.008  | -0.0050 |
| 40     | H    | 0.005  | -0.0035 |
| 41     | C    | 0.002  | 0.0046  |
| 42     | H    | 0.01   | -0.0068 |
| 43     | H    | 0.007  | -0.0086 |
| 44     | C    | 0.003  | -0.0061 |
| 45     | C    | 0.012  | 0.0419  |
| 46     | H    | 0.045  | 0.0440  |
| 47     | H    | 0.009  | 0.0145  |
| 48     | C    | 0.079  | 0.1581  |
| 49     | N    | 0.003  | -0.0008 |
| 50     | H    | -0.002 | -0.0035 |
| 51     | N    | 0.049  | -0.0845 |
| 52     | O    | 0.103  | -0.1945 |
| 53     | O    | 0.039  | -0.0853 |
| 54     | O    | 0.026  | 0.0355  |
| 55     | H    | 0.017  | 0.0290  |
| 56     | O    | 0.047  | 0.0889  |

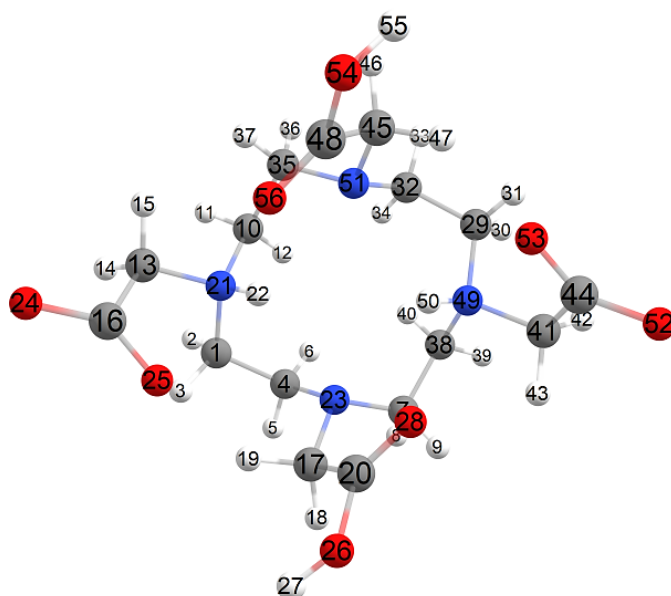

Figure S8:  $H_4DOTA$  with atomic numbering for Fukui indices and CDD values.

Table S4: Fukui indices ( $f^0$ ) and CDD values for all atoms of Zr-DOTA.

| Number | Atom | $f^0$  | CDD     |
|--------|------|--------|---------|
| 1      | Zr   | 0.285  | 0.532   |
| 2      | O    | 0.010  | -0.039  |
| 3      | O    | 0.096  | -0.0909 |
| 4      | N    | 0.001  | -0.0233 |
| 5      | C    | -0.006 | -0.0039 |
| 6      | H    | 0.007  | 0.0019  |
| 7      | H    | 0.014  | 0.0066  |
| 8      | C    | -0.004 | -0.0033 |
| 9      | H    | 0.014  | 0.0047  |
| 10     | H    | 0.005  | 0.0031  |
| 11     | C    | 0.002  | -0.0095 |
| 12     | H    | 0.017  | 0.0027  |
| 13     | H    | 0.013  | 0.0003  |
| 14     | C    | 0.011  | 0.0175  |
| 15     | O    | 0.010  | -0.0389 |
| 16     | O    | 0.096  | -0.0908 |
| 17     | N    | 0.001  | -0.0232 |
| 18     | C    | -0.006 | -0.0039 |
| 19     | H    | 0.007  | 0.0019  |
| 20     | H    | 0.014  | 0.0065  |
| 21     | C    | -0.004 | -0.0033 |
| 22     | H    | 0.014  | 0.0046  |
| 23     | H    | 0.005  | 0.0031  |
| 24     | C    | 0.002  | -0.0095 |
| 25     | H    | 0.017  | 0.0028  |
| 26     | H    | 0.013  | 0.0003  |
| 27     | C    | 0.011  | 0.0176  |
| 28     | O    | 0.010  | -0.0389 |
| 29     | O    | 0.096  | -0.0908 |
| 30     | N    | 0.001  | -0.0232 |
| 31     | C    | -0.006 | -0.0039 |
| 32     | H    | 0.007  | 0.0019  |
| 33     | H    | 0.014  | 0.0065  |
| 34     | C    | -0.004 | -0.0033 |
| 35     | H    | 0.014  | 0.0046  |
| 36     | H    | 0.005  | 0.0031  |
| 37     | C    | 0.002  | -0.0095 |
| 38     | H    | 0.017  | 0.0028  |
| 39     | H    | 0.013  | 0.0003  |
| 40     | C    | 0.011  | 0.0176  |
| 41     | O    | 0.010  | -0.039  |
| 42     | O    | 0.096  | -0.0909 |
| 43     | N    | 0.001  | -0.0233 |
| 44     | C    | -0.006 | -0.0039 |
| 45     | H    | 0.007  | 0.0019  |
| 46     | H    | 0.014  | 0.0066  |
| 47     | C    | -0.004 | -0.0033 |
| 48     | H    | 0.014  | 0.0047  |
| 49     | H    | 0.005  | 0.0031  |
| 50     | C    | 0.002  | -0.0095 |
| 51     | H    | 0.017  | 0.0027  |
| 52     | H    | 0.013  | 0.0003  |
| 53     | C    | 0.011  | 0.0175  |

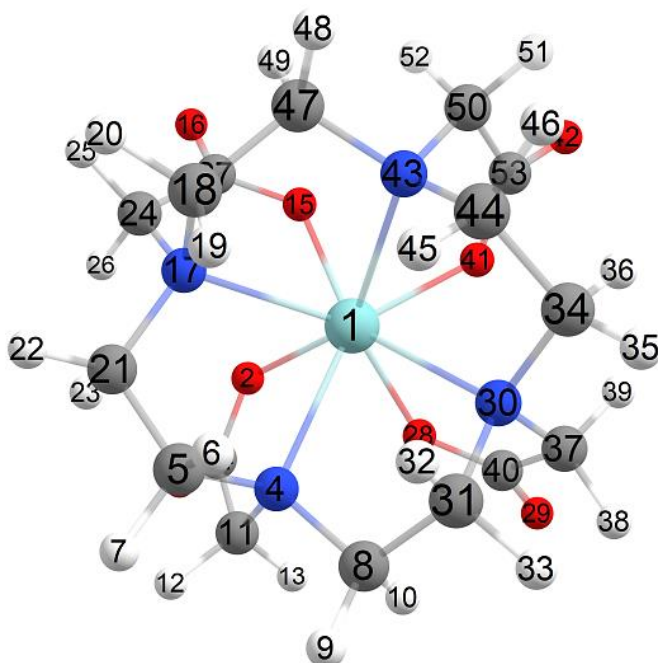

Figure S9: Zr-DOTA with atomic numbering for Fukui indices and CDD values.



- 1 D. Parker, K. Pulukkody, F. C. Smith, A. Batsanov and J. A. K. Howard, *Journal of the Chemical Society, Dalton Transactions*, 1994, **0**, 689–693.
- 2 V. Fiegel, C. Berthon, A. Costagliola, G. Blain, J. Vandenborre, J. Vermeulen, G. Saint-Louis, L. Guerin, T. Sauvage, M. Fattahi-Vanani, L. Venault and L. Berthon, *Radiation Physics and Chemistry*, 2019, **165**, 108409.
